# Supplementary material for: Clinical heterogeneity of frontotemporal dementia and Parkinsonism linked to chromosome 17 caused by MAPT N279K mutation in relation to tau positron emission tomography features
Source: PubMed Central journal article supplement (PMC6593784; doi:10.1002/mds.27623), 2019-02-17

Figure 1

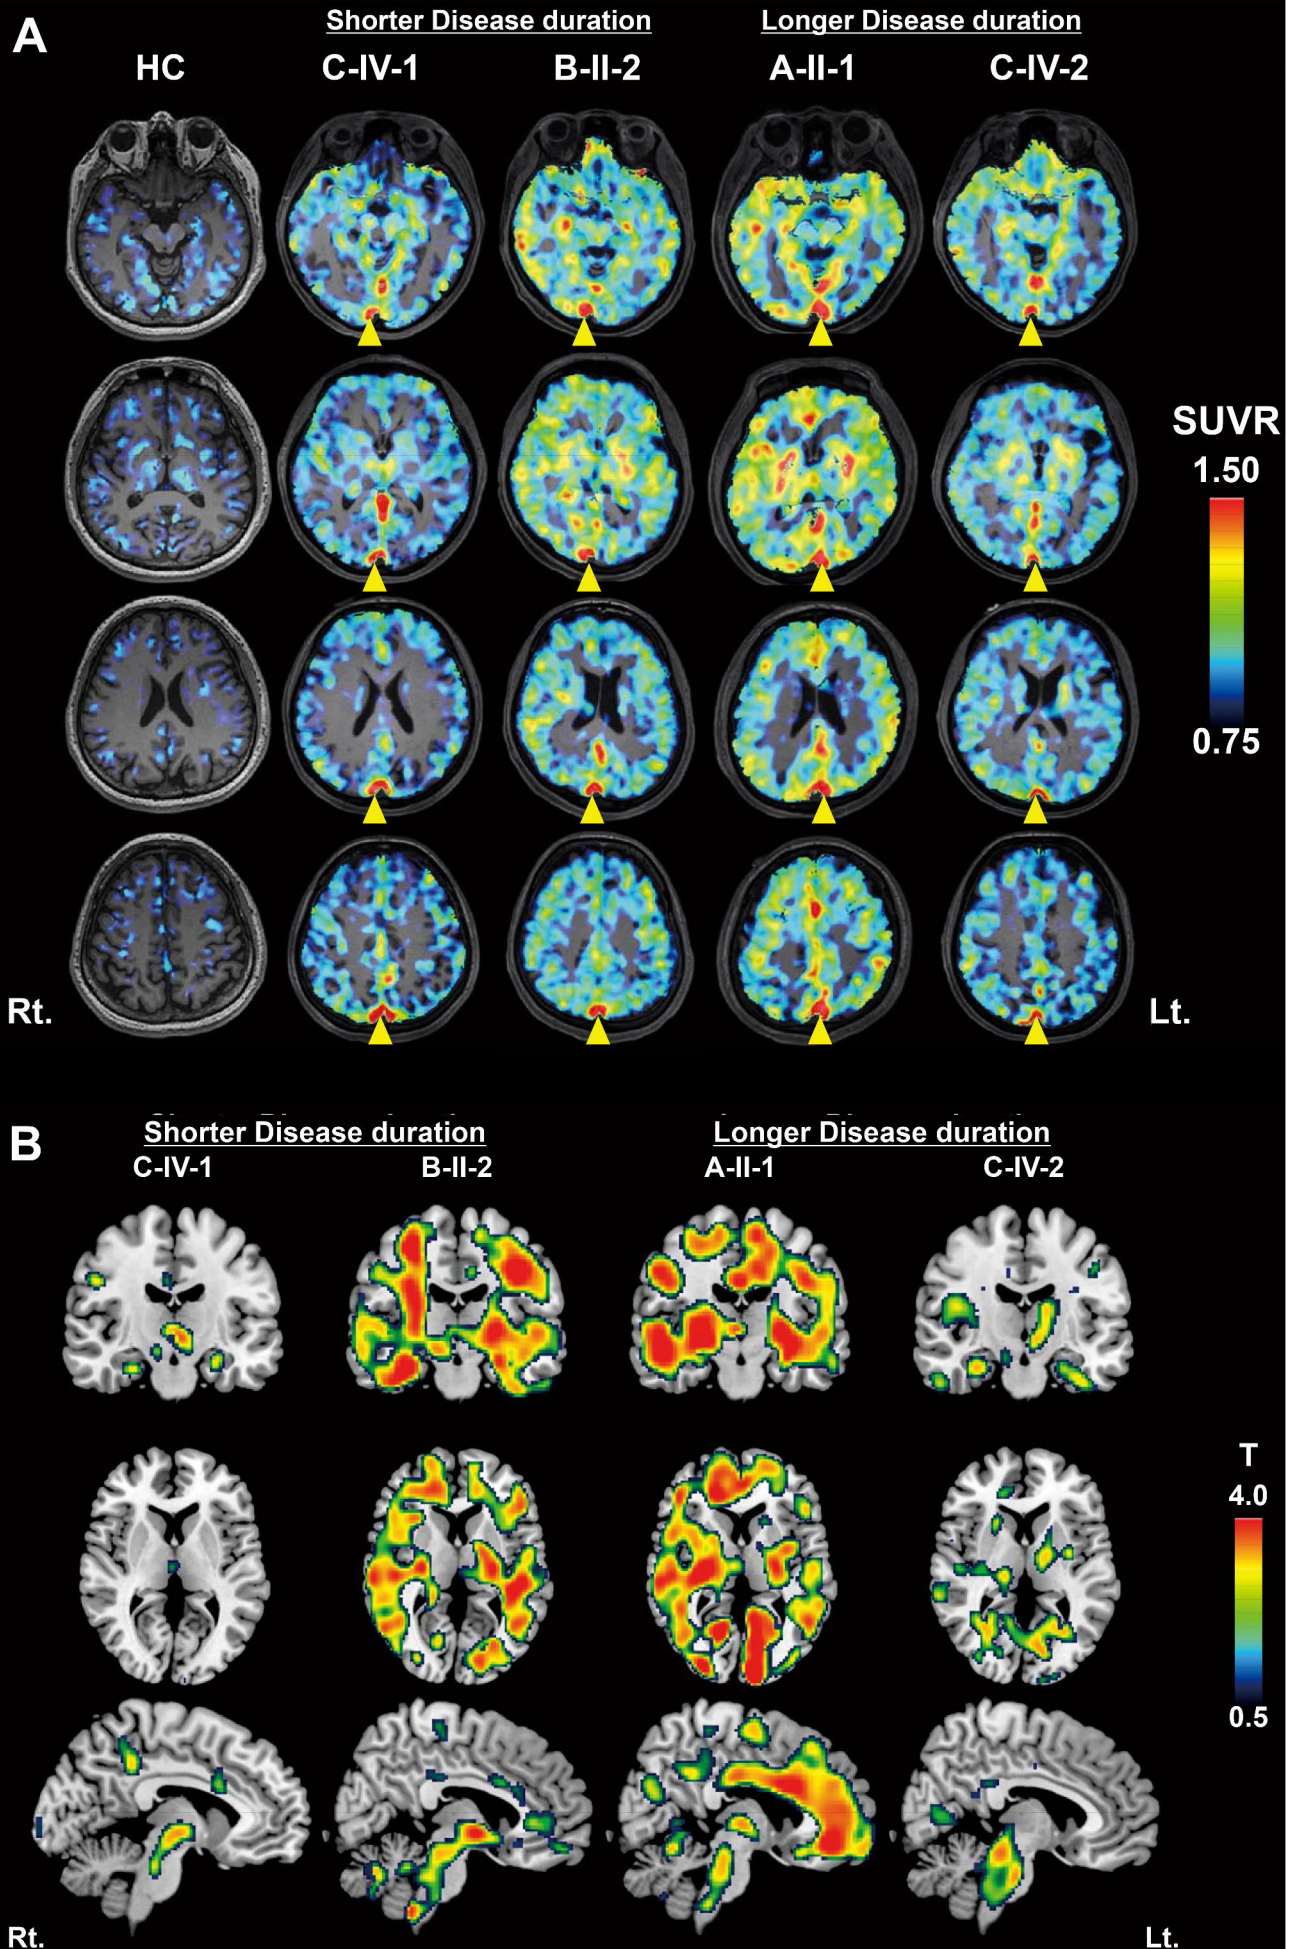

Supplement: MDS-34-568-s001.pdf [file MDS-34-568-s001.pdf]
